# Supplementary material for: Interpretation of Quantities Displayed in Pictorial Charts
Source: Front Psychol. 2021 Feb 25;12:609027. doi: 10.3389/fpsyg.2021.609027 (PMC7959779; doi:10.3389/fpsyg.2021.609027)
Supplement: Supplementary file 1 [file Data_Sheet_1.CSV]

ID	Gender	Age	I1a	I1b	I1c	I1d	I2a	I2b	I2c	I2d	I3a	I3b	I3c	I3d
1	F	19	80	200	10	300	40	240	400	20	200	70	10	800
2	F	18	75	175	10	250	60	150	200	55	150	75	25	225
3	F	23	90	200	10	350	50	150	200	25	200	60	10	350
4	F	21	75	200	10	300	50	150	250	20	300	75	20	500
5	F	19	80	120	10	200	100	100	150	50	200	50	10	300
6	F	20	80	130	8	230	30	200	300	25	220	30	10	250
7	F	20	80	250	5	500	50	250	450	20	250	50	20	300
8	F	20	90	150	15	200	50	200	250	30	150	80	10	1000
9	F	20	80	180	8	200	30	280	300	30	300	60	10	400
10	F	23	90	180	10	220	50	200	400	25	180	80	15	400
11	F	20	90	130	15	250	70	120	170	50	150	70	30	170
12	F	21	85	175	10	500	50	175	500	10	250	75	10	500
13	F	20	85	160	10	200	75	180	270	40	140	90	10	170
14	F	20	90	120	15	200	80	150	280	55	130	85	15	350
15	F	20	80	140	10	220	60	140	240	20	140	80	20	400
16	F	20	90	120	20000	300	50	200	400	400	200	50	11	400
17	F	20	80	200	10	600	50	200	500	20	300	70	20	500
18	F	23	80	130	10	250	60	160	250	30	150	70	30	250
19	F	23	100	200	10	300	50	200	400	33	200	50	25	400
20	M	22	80	150	10	200	50	200	400	25	300	50	10	1000
21	M	23	90	120	10	250	50	150	300	33	299	50	10	500
22	F	22	80	200	18	250	60	200	280	20	150	70	30	250
23	F	21	80	130	800	200	70	180	300	40	170	65	20	230
24	M	21	90	120	13	180	60	150	190	45	160	75	30	200
25	F	21	80	150	20	200	50	200	400	25	150	75	25	200
26	F	21	75	150	10	300	60	160	230	40	220	70	45	300
27	F	22	80	120	15	200	50	150	250	25	200	75	15	300
28	F	19	80	250	10	300	5	200	400	25	200	70	10	400
29	F	21	70	175	10	500	70	225	450	20	175	75	25	300
30	F	21	80	200	5	500	60	140	230	40	150	65	30	300
31	F	21	80	150	15	250	70	150	300	30	170	80	25	250
32	F	21	80	190	10	230	55	180	250	30	185	65	25	280
33	F	21	80	130	7	220	70	130	300	33	150	80	25	200
34	F	21	80	500	20	500	60	300	800	20	400	50	10	700
35	M	25	85	225	10	400	25	200	500	10	200	25	12,5	350
36	F	25	80	150	10	250	50	220	300	40	220	60	10	350
37	F	21	85	130	5	200	80	150	200	40	130	80	50	200
38	F	22	90	120	10	250	70	200	300	40	150	70	20	200
39	F	21	90	200	10	300	50	300	500	20	250	75	20	300
40	F	20	70	150	15	225	75	150	250	55	150	80	25	175
41	F	27	90	150	20	250	80	200	300	35	150	85	25	320
42	F	21	70	20	10	250	50	150	230	40	150	80	20	250
43	F	20	70	200	10	300	30	250	400	10	160	70	25	370
44	F	22	85	130	10	300	65	160	250	15	150	75	35	175
45	F	22	80	250	10	350	50	200	250	20	200	50	15	300
46	F	21	80	190	10	300	50	200	250	10	200	75	10	300
47	F	23	75	150	20	200	50	150	300	25	150	75	25	250
48	F	20	75	167	5	375	40	200	275	25	175	70	25	350
49	F	20	80	190	20	260	70	180	800	12	180	85	25	600
50	F	22	80	160	15	360	40	180	250	25	180	75	25	260
51	F	20	80	200	10	250	75	150	325	30	200	50	10,5	350
52	F	21	80	130	10	180	50	150	300	30	200	60	20	280
53	F	30	75	125	15	200	75	135	200	40	160	80	15	600
54	F	20	75	200	10	300	33	200	400	10	200	75	8	400
55	F	23	75	230	10	350	50	250	375	30	200	70	25	310
56	F	24	90	130	10	200	60	140	200	40	130	75	25	270
57	M	25	75	180	8	280	50	230	550	33	210	75	12,5	800
58	F	23	80	175	10	300	50	200	300	25	200	50	25	300
59	F	25	75	180	10	250	40	230	400	20	200	60	10	350
60	F	22	90	200	1000	300	70	80	300	30	200	50	10	200
61	F	22	50	300	5	500	30	250	500	5	200	70	10	500
62	F	20	75	200	1	300	50	200	800	25	250	75	9	400
63	F	20	85	300	5	450	30	350	700	10	250	75	15	450
